# Supplementary material for: Cirrhotic Cardiomyopathy Following Bile Duct Ligation in Rats—A Matter of Time?
Source: MDPI journal article supplement (doi:10.3390/ijms24098147), 2023-05-02
Supplement: s1 [file s1]

## A longitudinal rat study of cirrhotic cardiomyopathy

bile duct ligation model

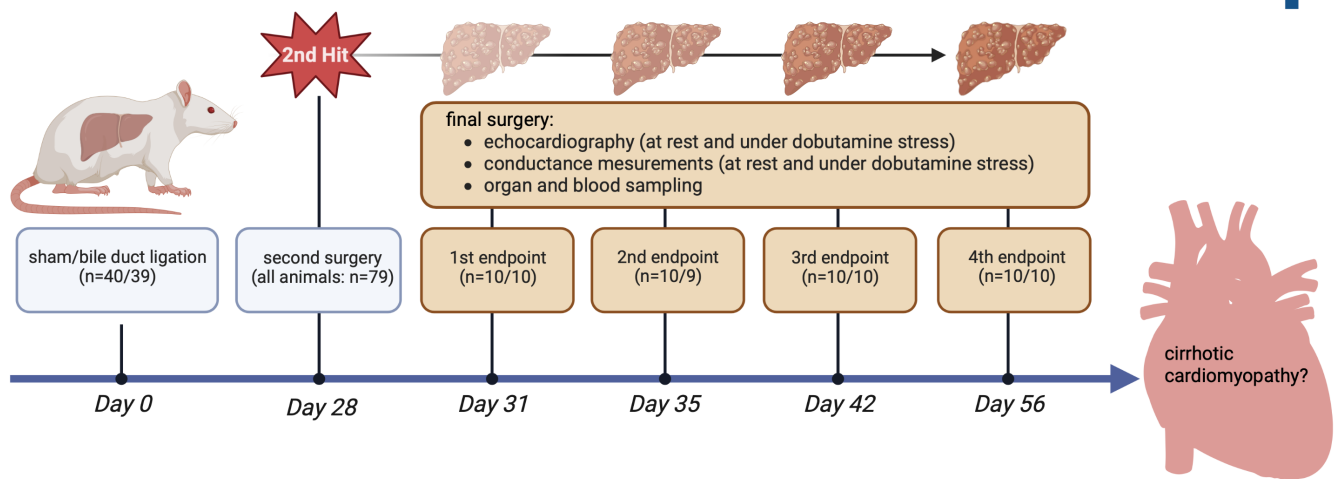

Created with BioRender.com

**Figure S2. Schematic illustration of the study protocol**
