# Supplementary material for: Cirrhotic Cardiomyopathy Following Bile Duct Ligation in Rats—A Matter of Time?
Source: MDPI journal article supplement (doi:10.3390/ijms24098147), 2023-05-02
Supplement: s1 [file s1]

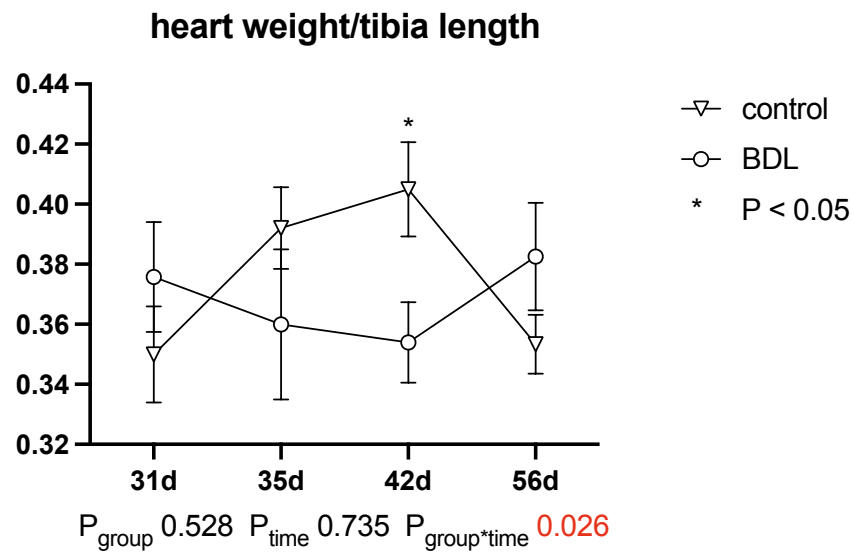

**Figure S1. Cardiac remodeling index (CRI) of rat hearts after bile duct ligation (BDL) versus control.**

The measured heart weight was normalized to the tibial length of each rat respectively and displayed as mean ratio from day 31 to 56 after BDL (mean  $\pm$  SEM).  $P_{\text{group}} < 0.528$ ,  $P_{\text{time}} < 0.735$ ,  $P_{\text{group*time}} = 0.026$ ,  $*P_{\text{d42}} = 0.02$ .  $P \leq 0.05$  was considered significant.
